# Supplementary figures and images for: Dynamic Fair Division with Partial Information
Source: Atypon-hosted journal article supplement (doi:10.1287/opre.2023.0608), 2025-01-15

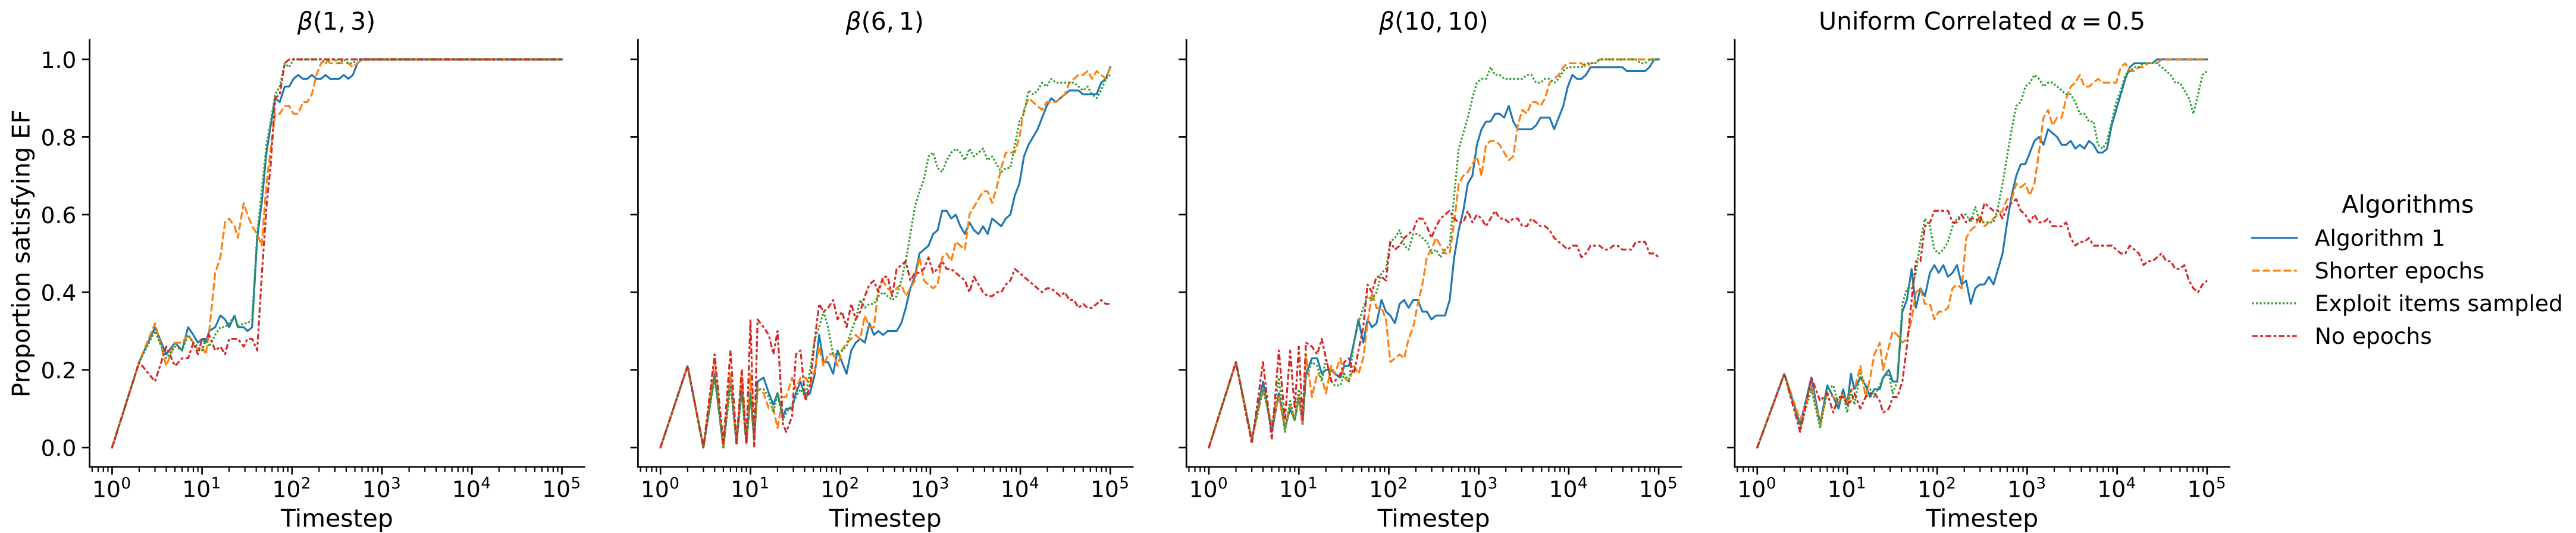

Supplement: opre.2023.0608.sm1.zip [file algs-ef-2.pdf › plots/algs-ef-2.pdf]

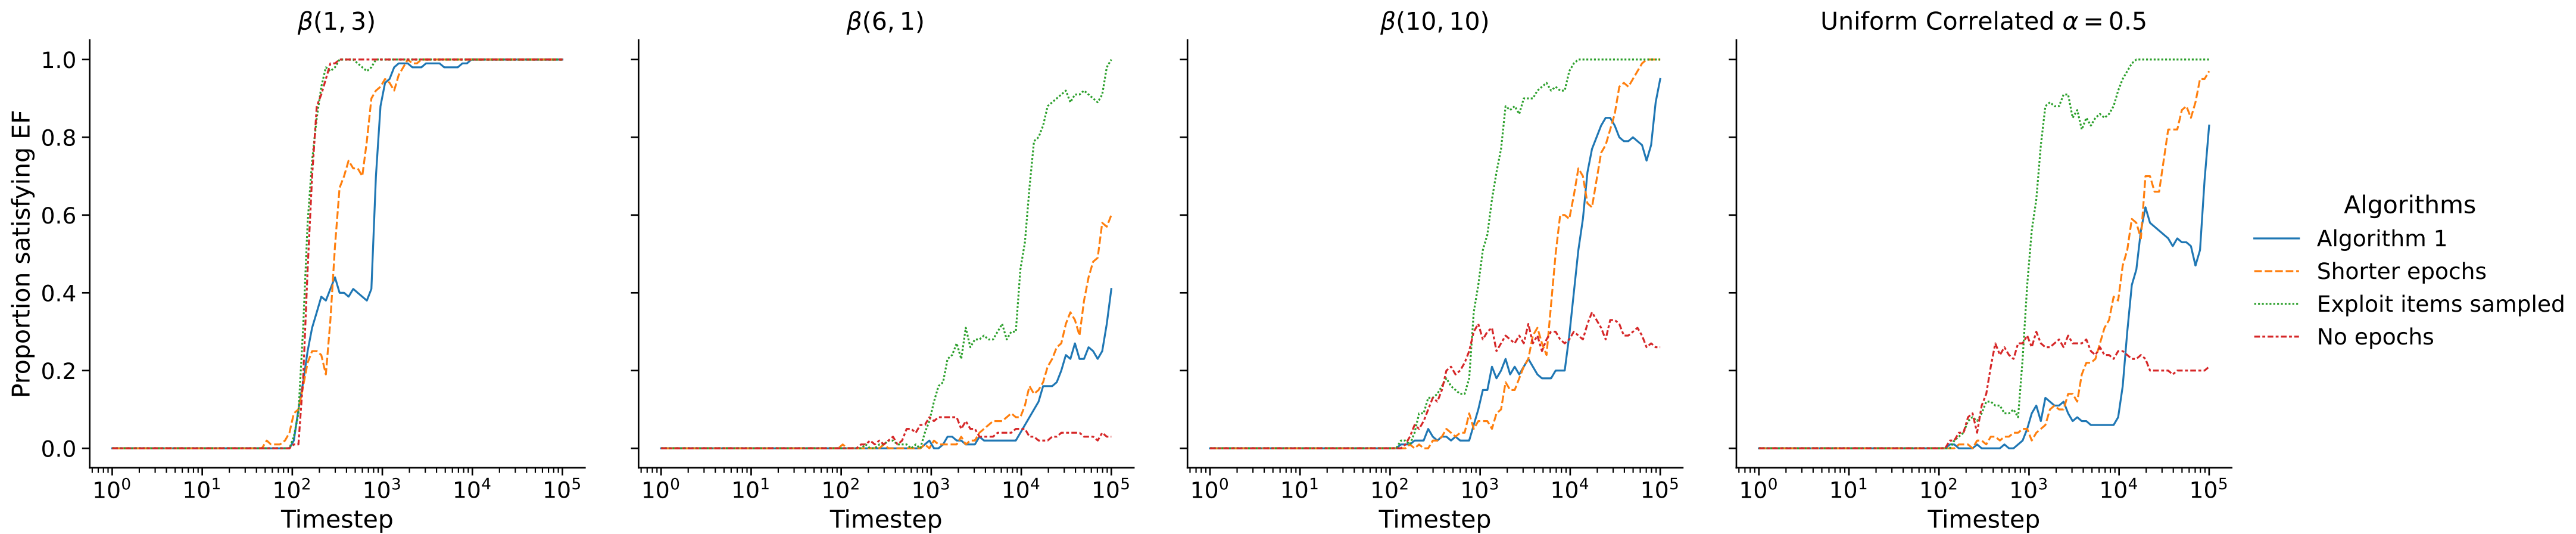

Supplement: opre.2023.0608.sm1.zip [file algs-ef-5.pdf › plots/algs-ef-5.pdf]

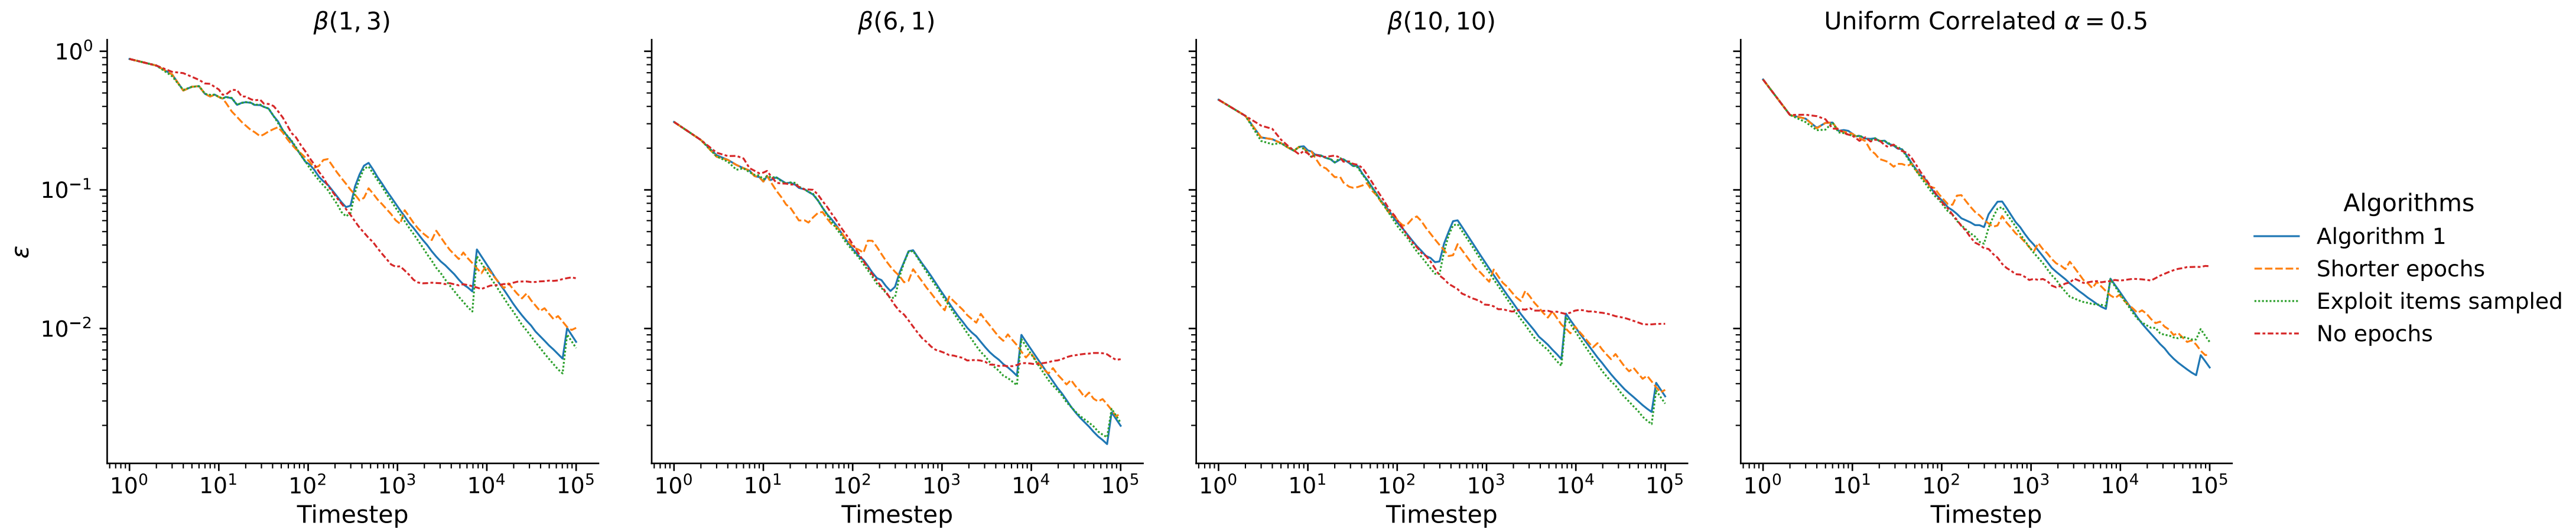

Supplement: opre.2023.0608.sm1.zip [file algs-welf-2.pdf › plots/algs-welf-2.pdf]

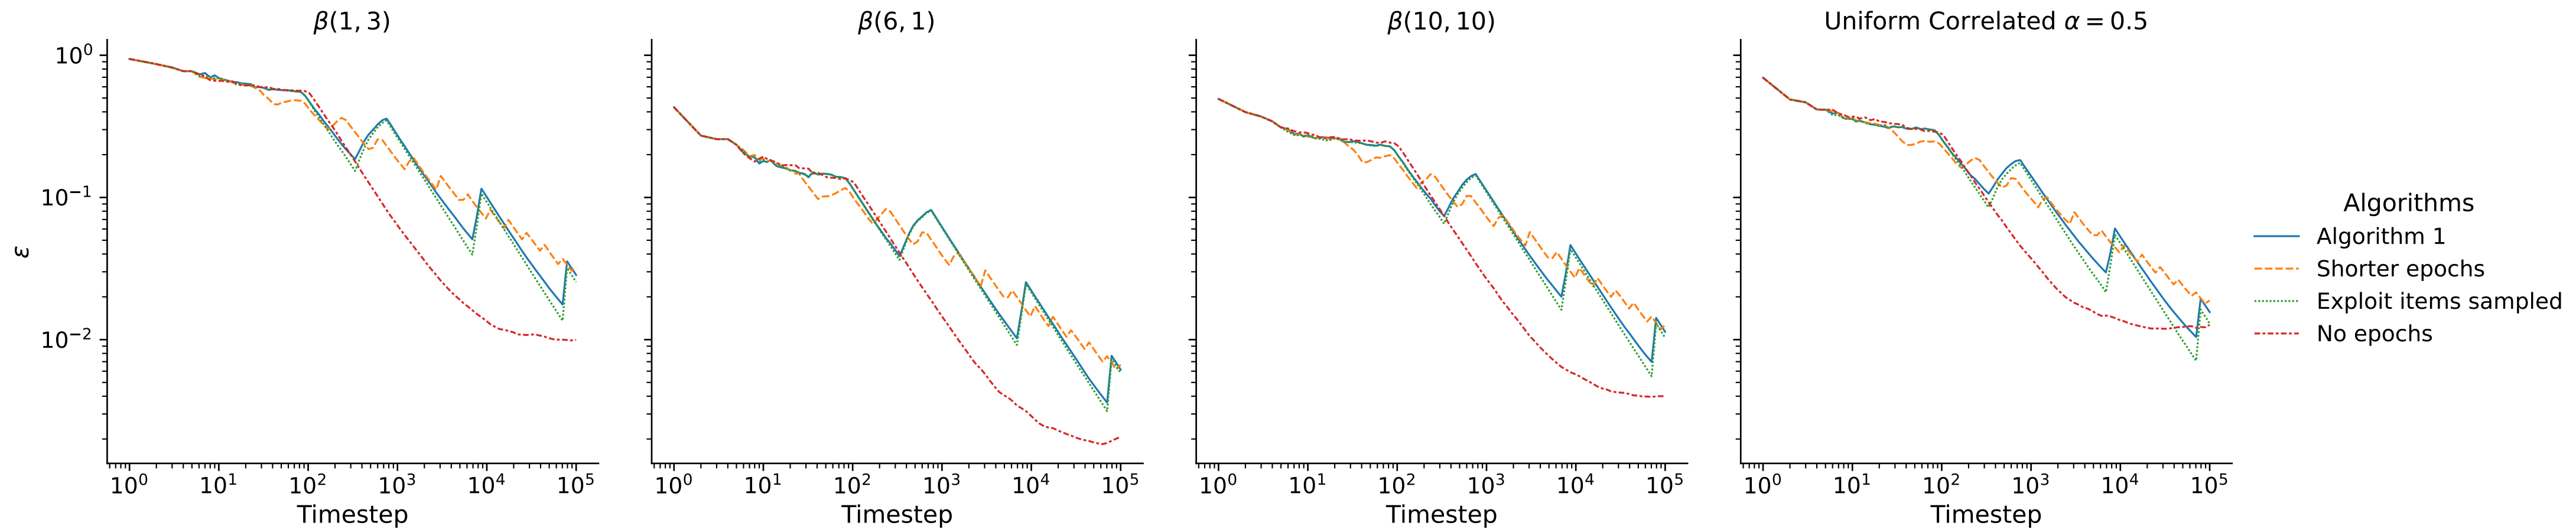

Supplement: opre.2023.0608.sm1.zip [file algs-welf-5.pdf › plots/algs-welf-5.pdf]

Algorithm 1

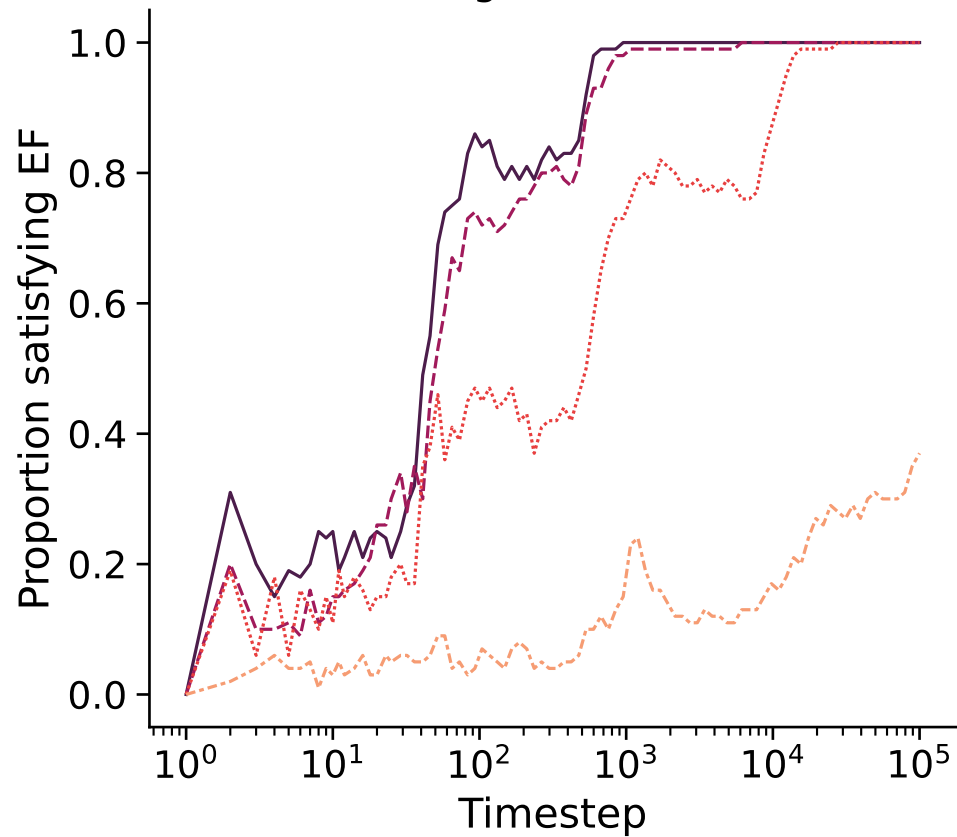

Welfare Maximizing

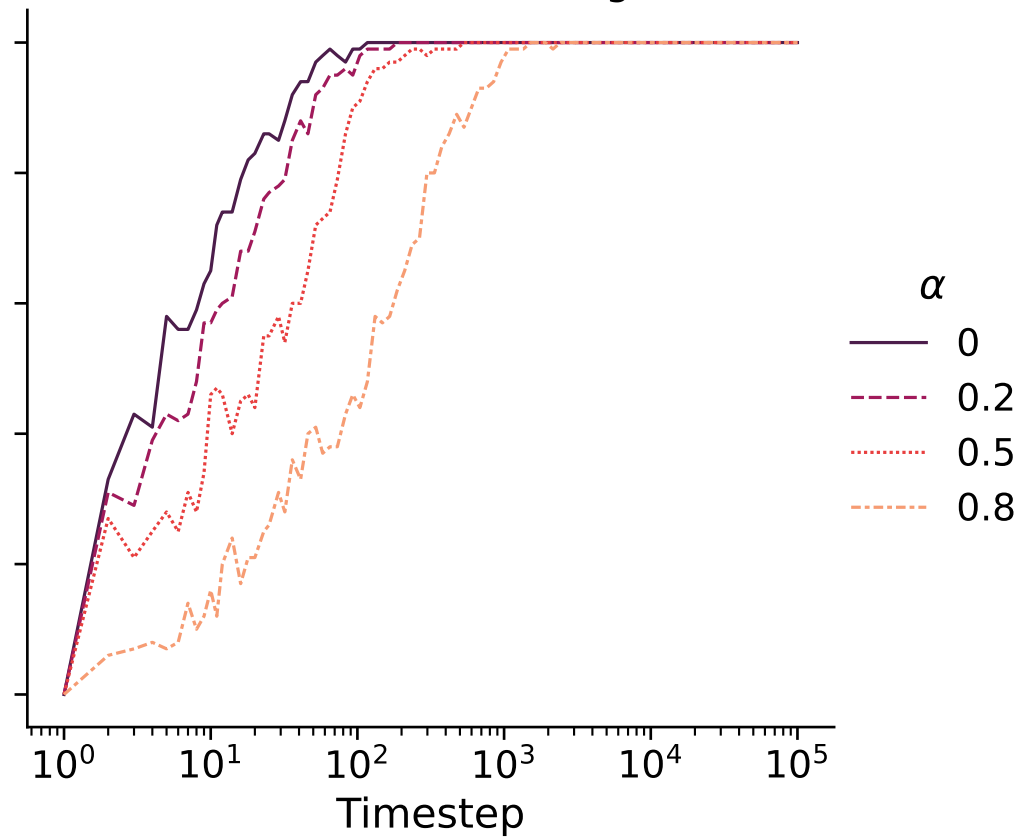

Supplement: opre.2023.0608.sm1.zip [file cor-ef-2.pdf › plots/cor-ef-2.pdf]

Algorithm 1

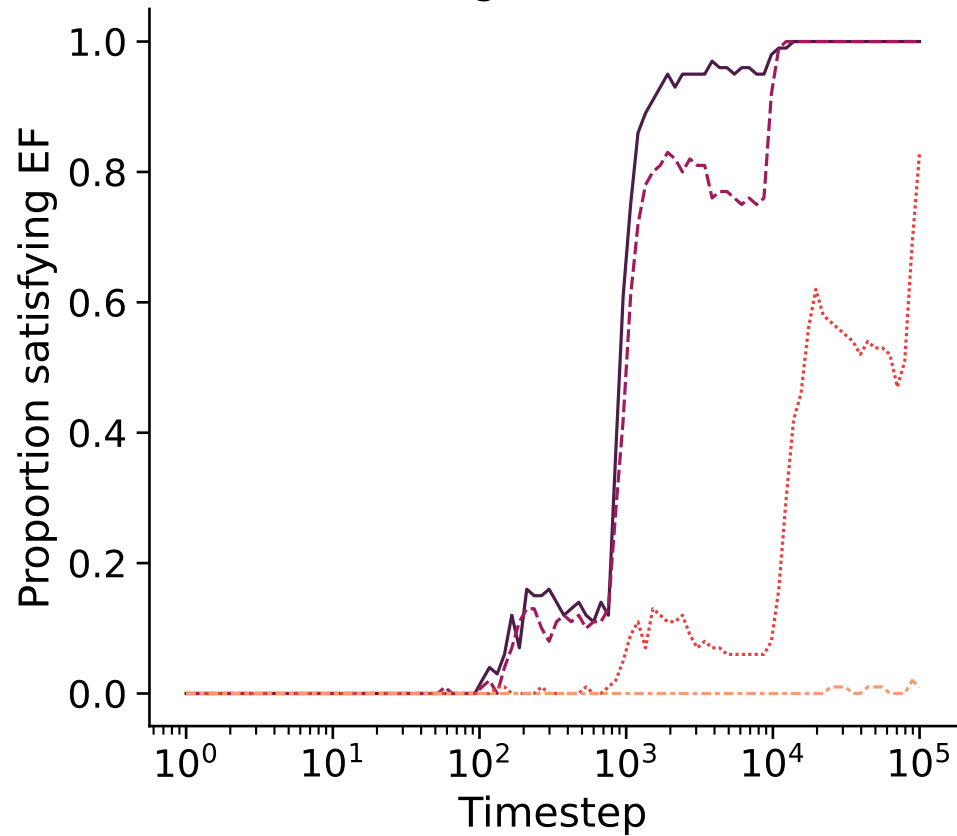

Welfare Maximizing

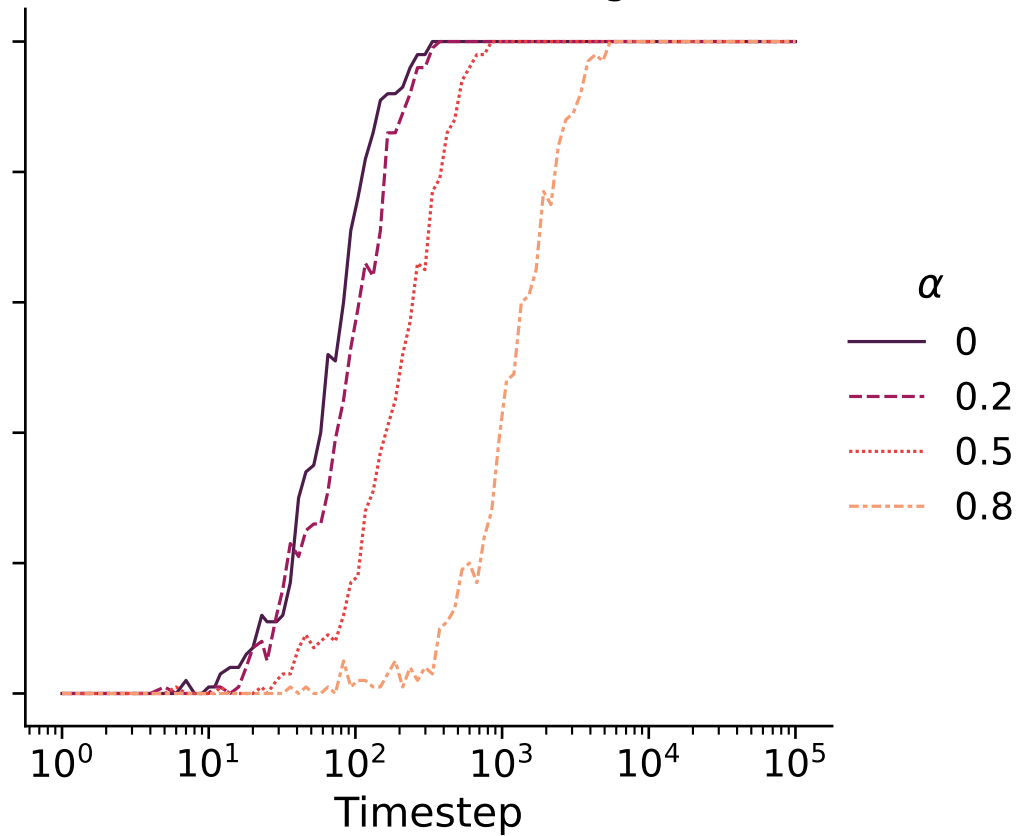

Supplement: opre.2023.0608.sm1.zip [file cor-ef-5.pdf › plots/cor-ef-5.pdf]

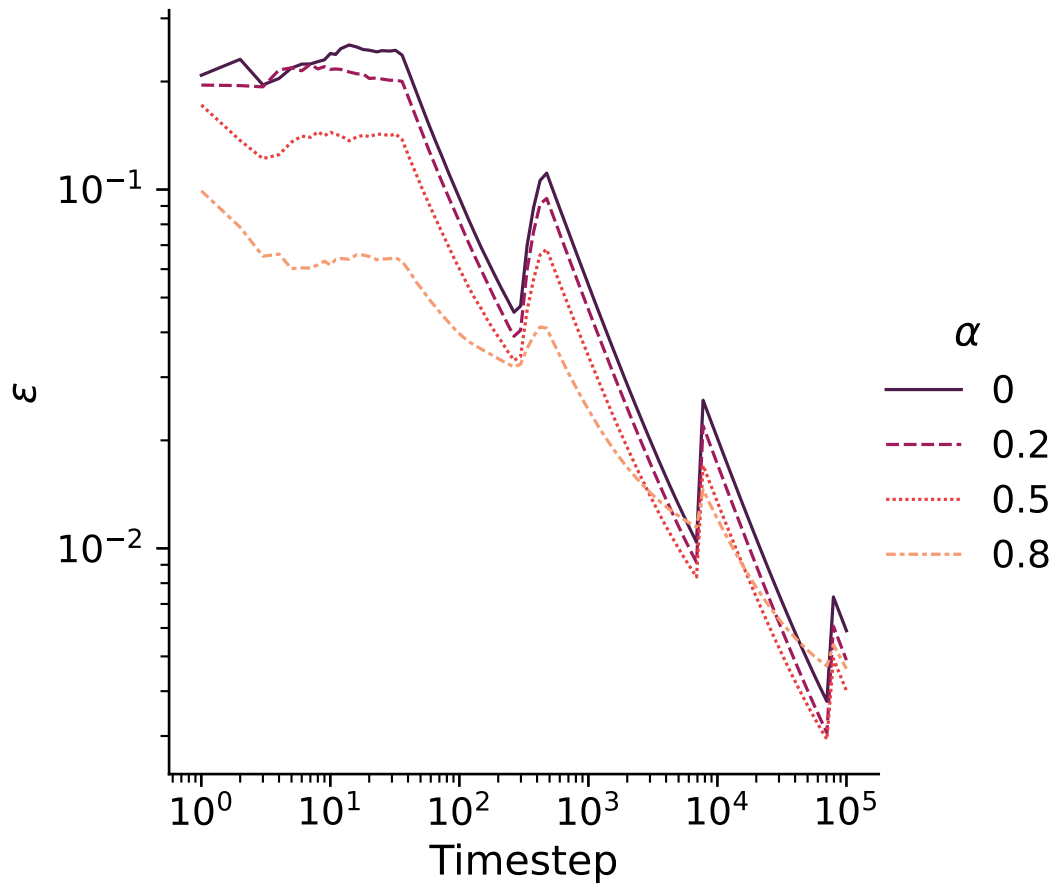

Supplement: opre.2023.0608.sm1.zip [file cor-welf-2.pdf › plots/cor-welf-2.pdf]

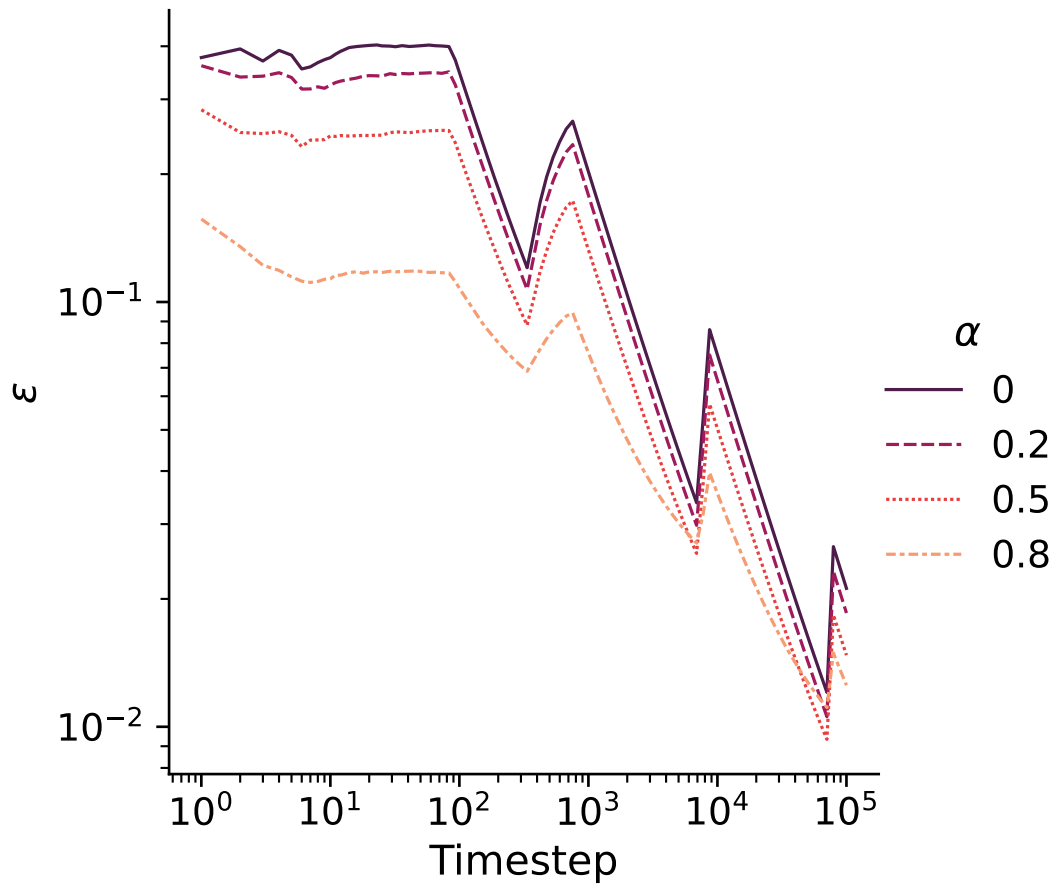

Supplement: opre.2023.0608.sm1.zip [file cor-welf-5.pdf › plots/cor-welf-5.pdf]

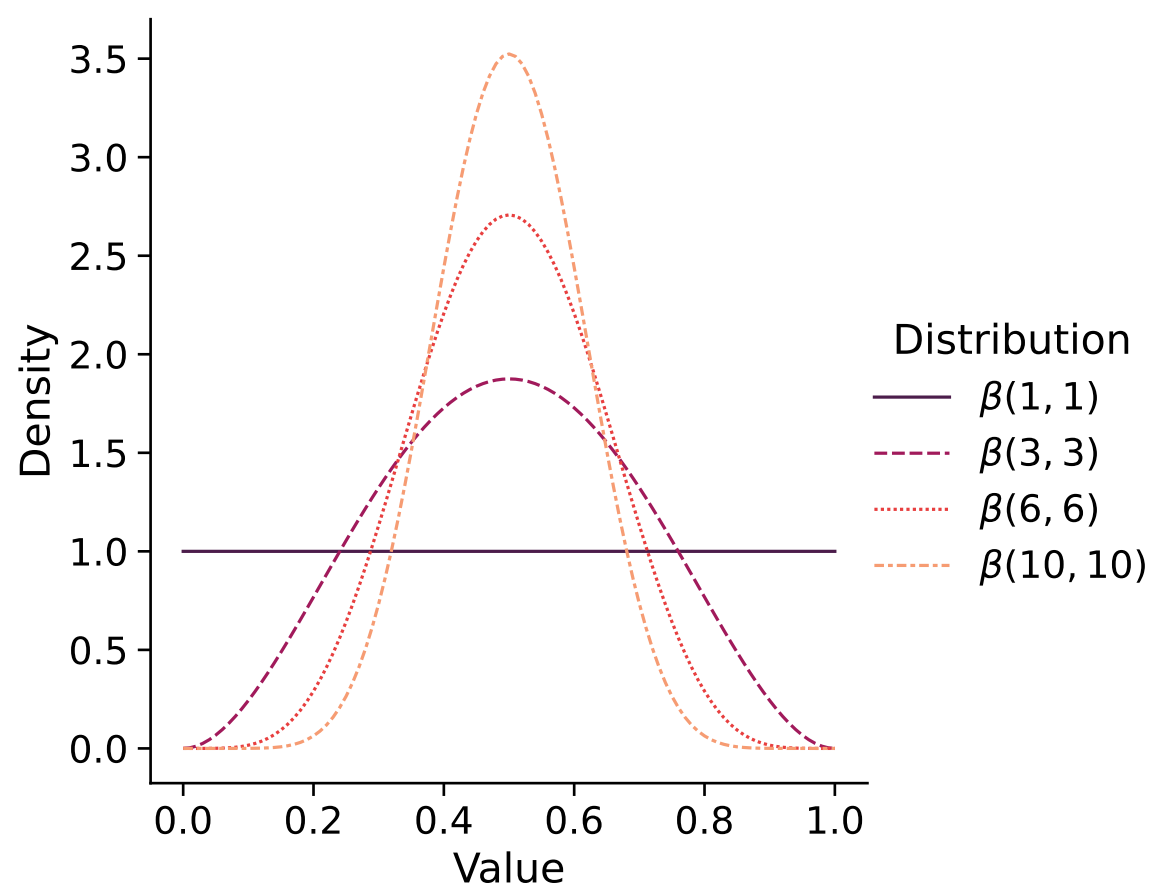

Supplement: opre.2023.0608.sm1.zip [file peaked-dists.pdf › plots/peaked-dists.pdf]

Algorithm 1

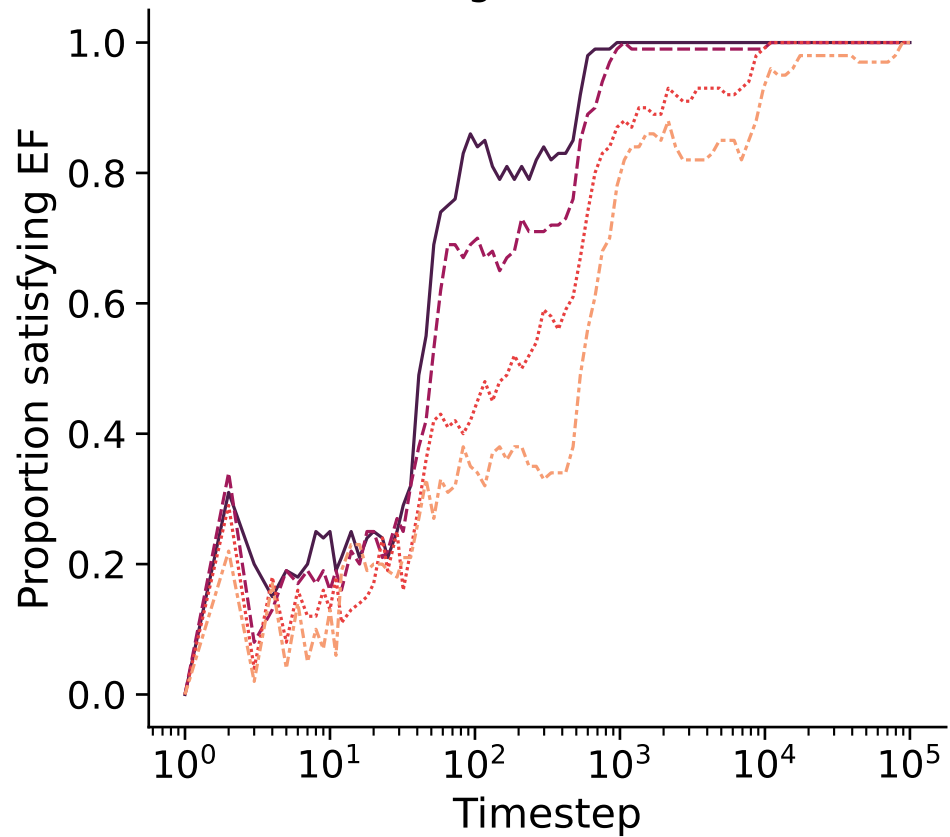

Welfare Maximizing

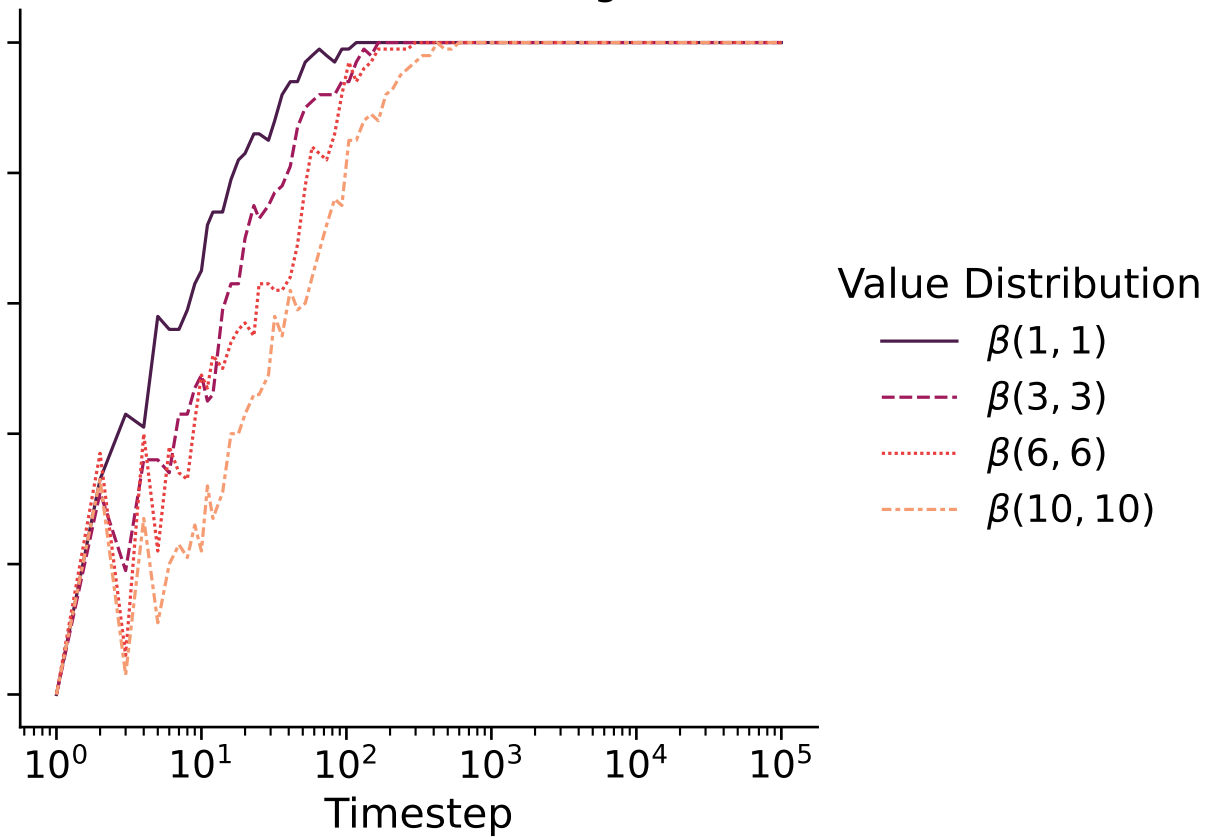

Supplement: opre.2023.0608.sm1.zip [file peaked-ef-2.pdf › plots/peaked-ef-2.pdf]

Algorithm 1

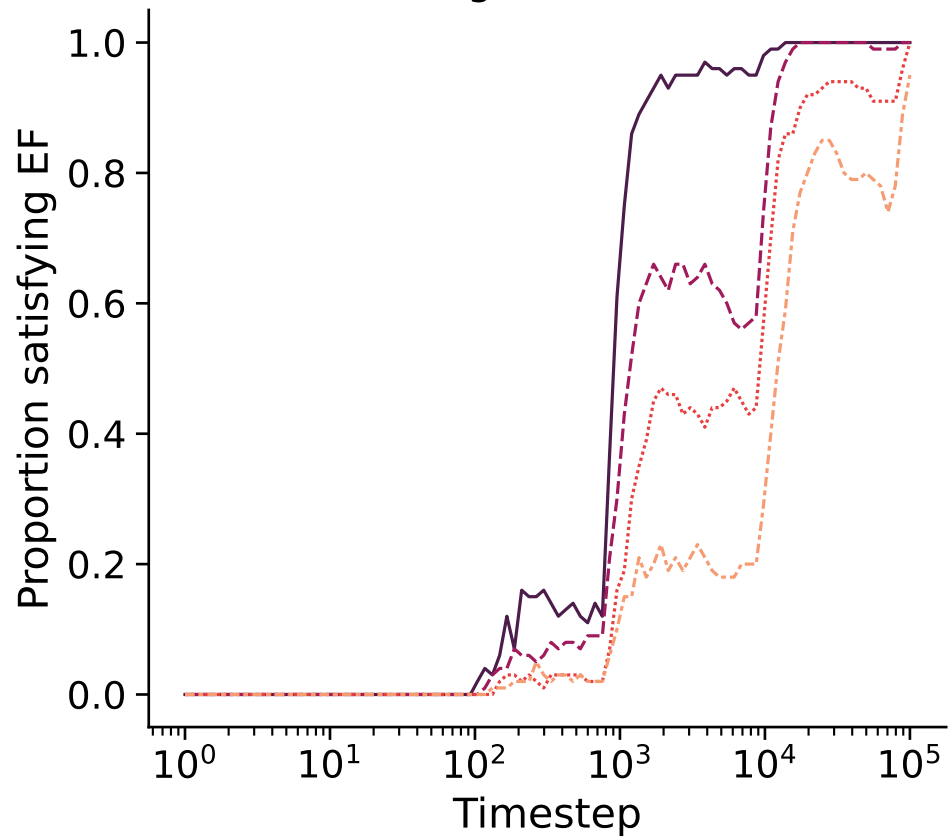

Welfare Maximizing

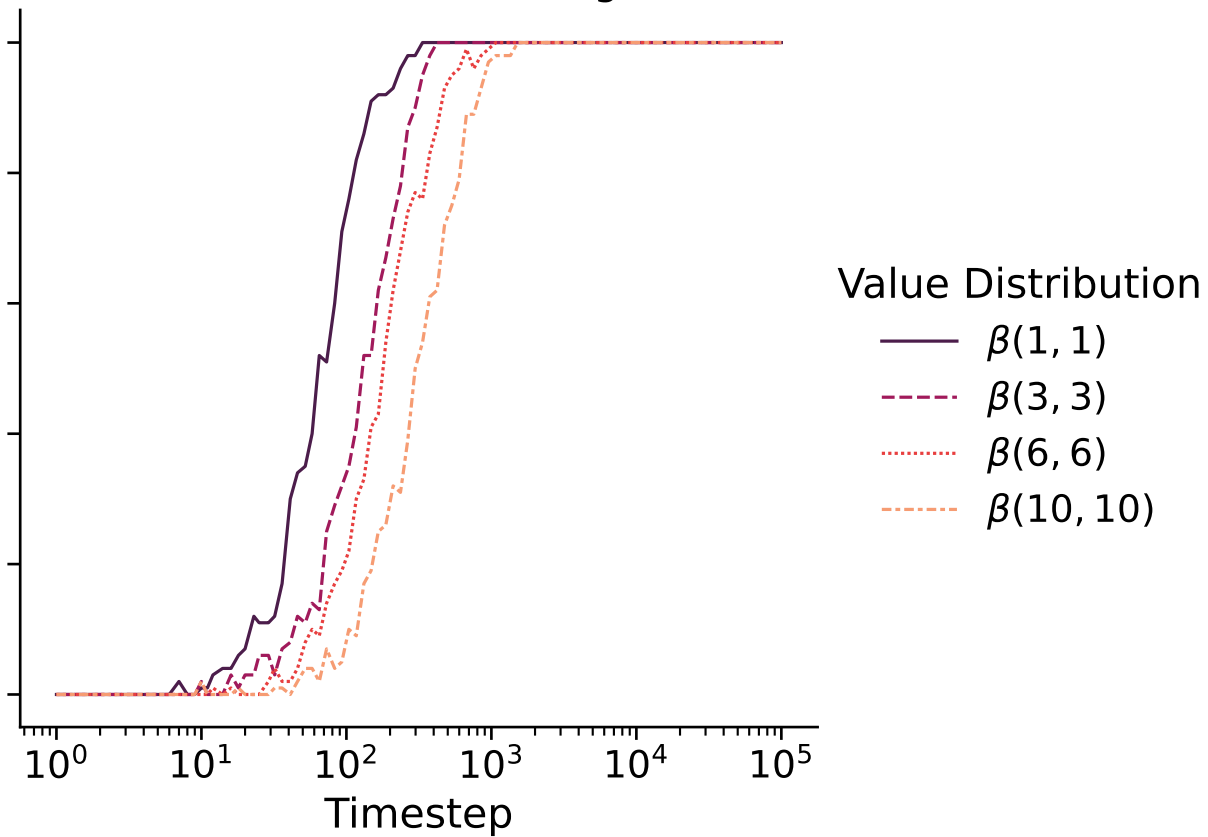

Supplement: opre.2023.0608.sm1.zip [file peaked-ef-5.pdf › plots/peaked-ef-5.pdf]

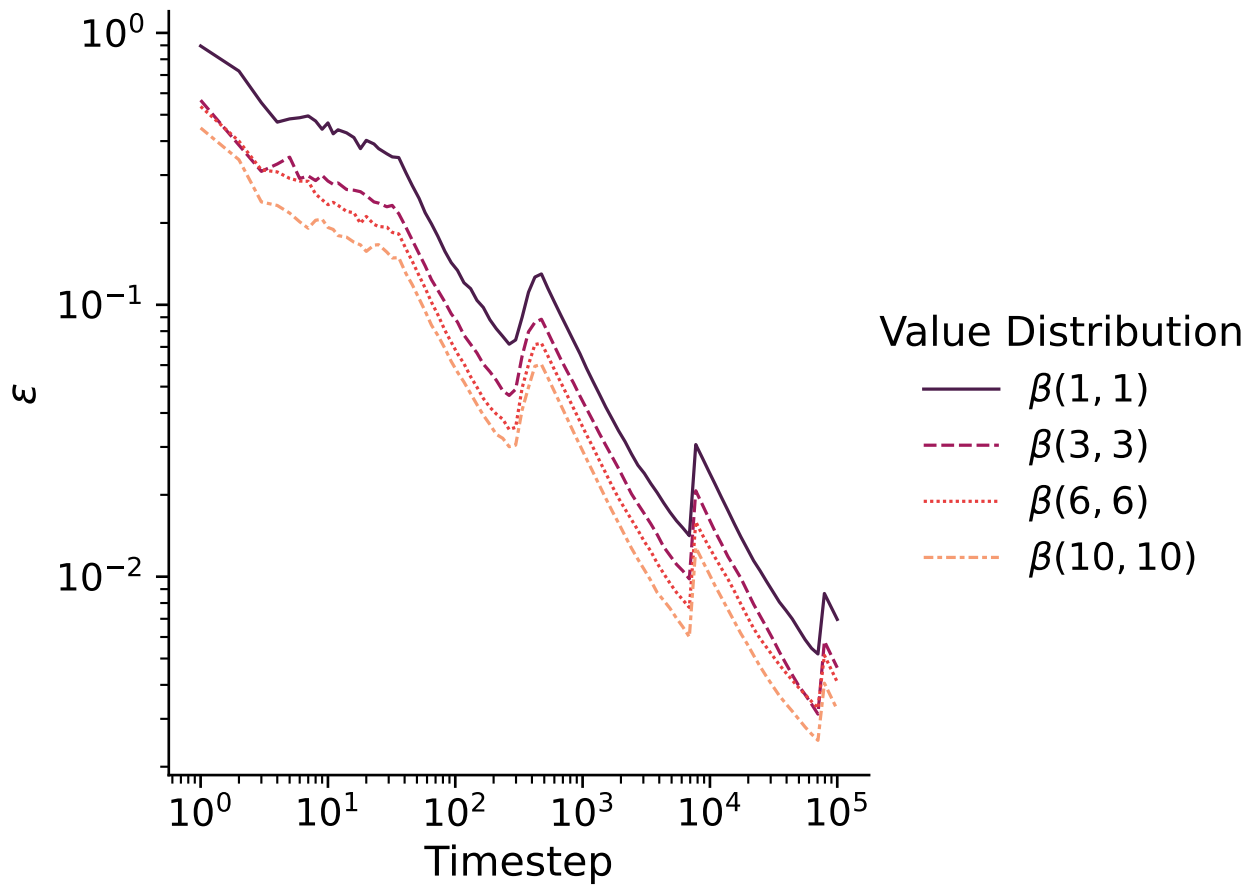

Supplement: opre.2023.0608.sm1.zip [file peaked-welf-2.pdf › plots/peaked-welf-2.pdf]

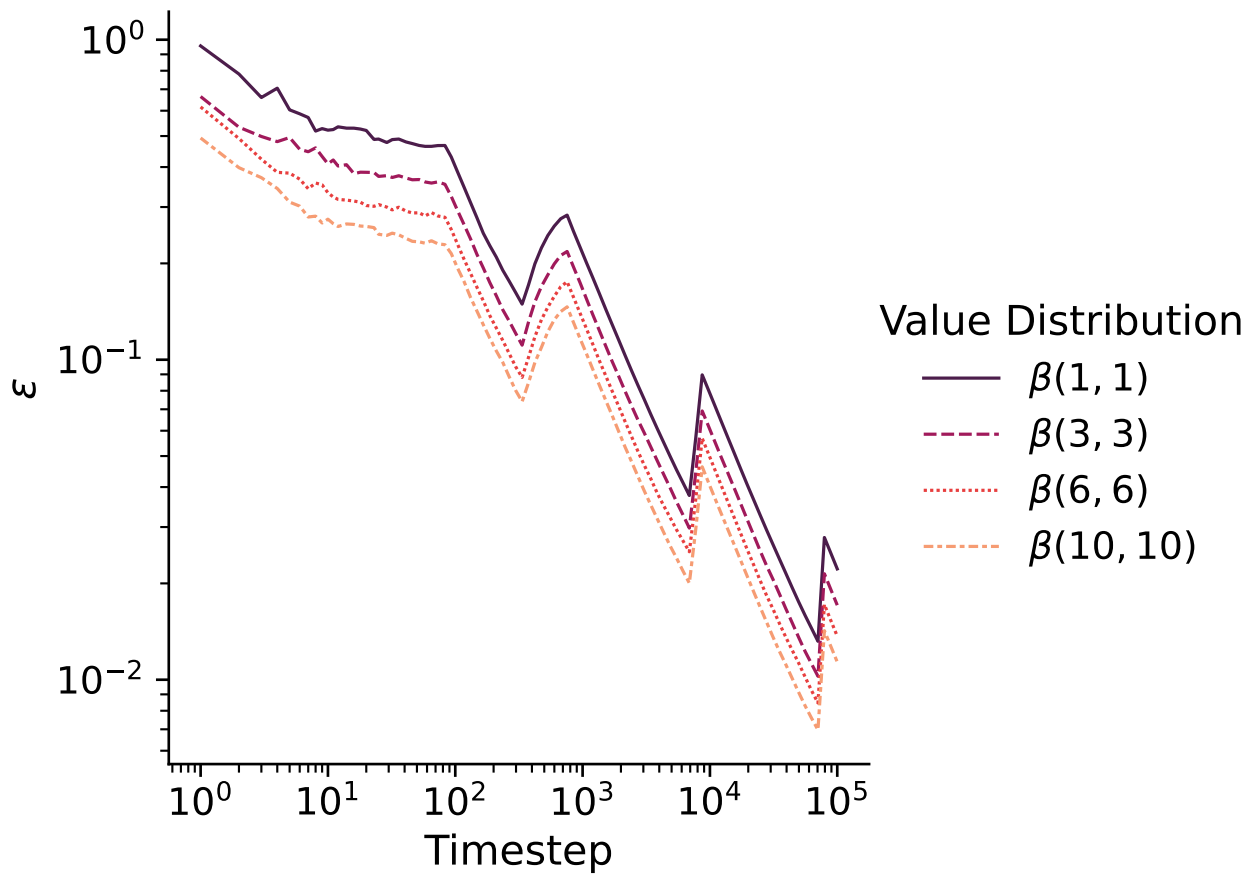

Supplement: opre.2023.0608.sm1.zip [file peaked-welf-5.pdf › plots/peaked-welf-5.pdf]

Algorithm 1

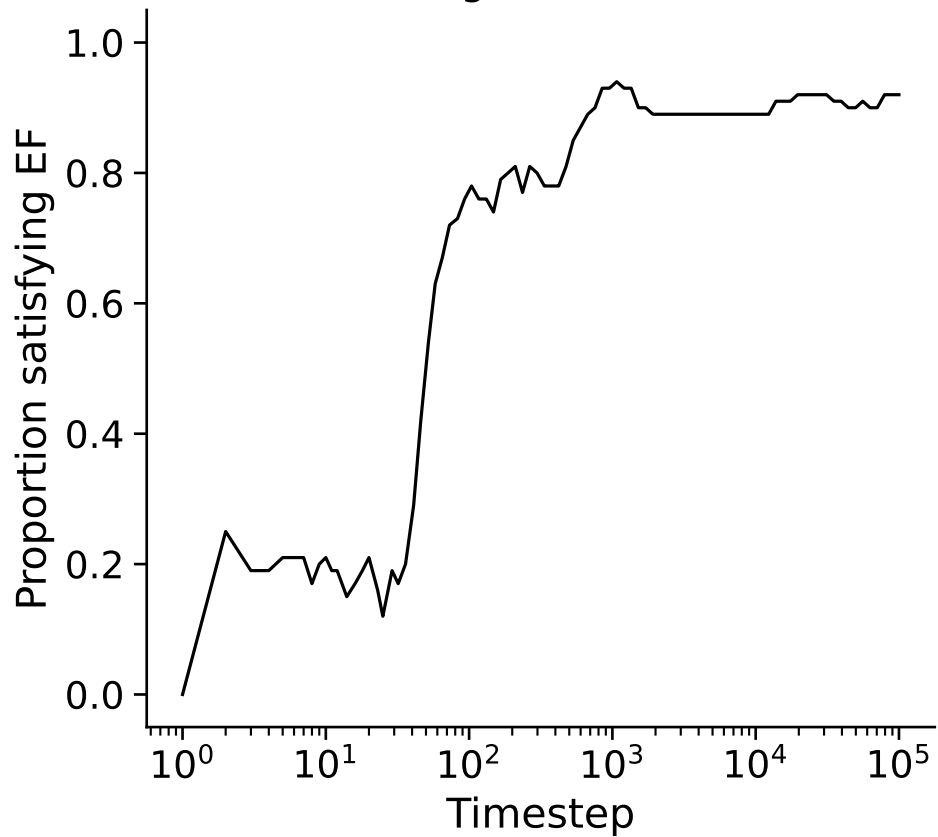

Quantile Maximizing

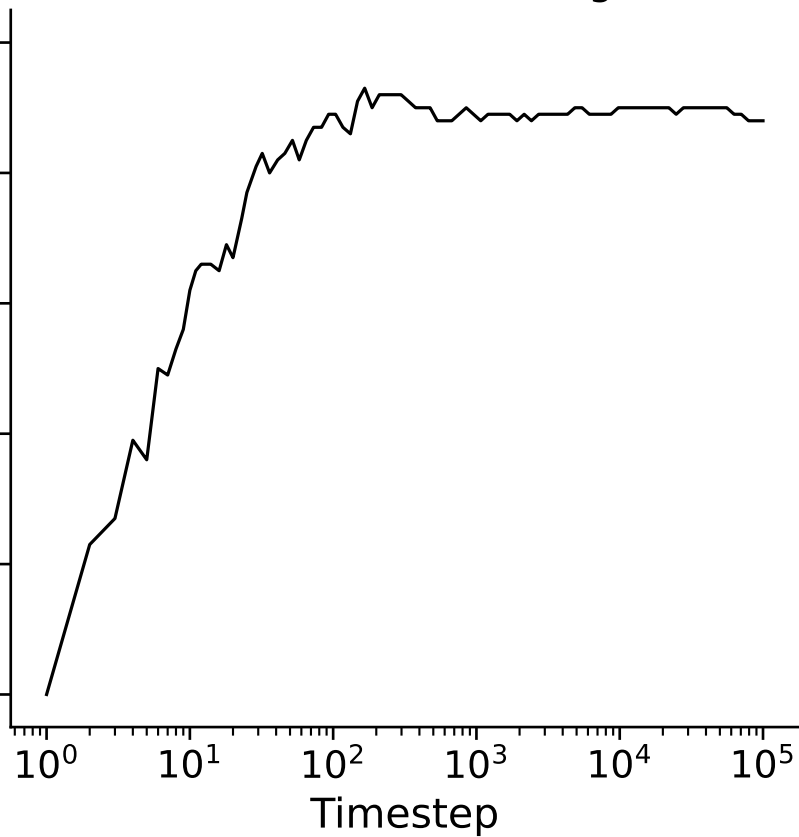

Supplement: opre.2023.0608.sm1.zip [file real-ef-2.pdf › plots/real-ef-2.pdf]

Algorithm 1

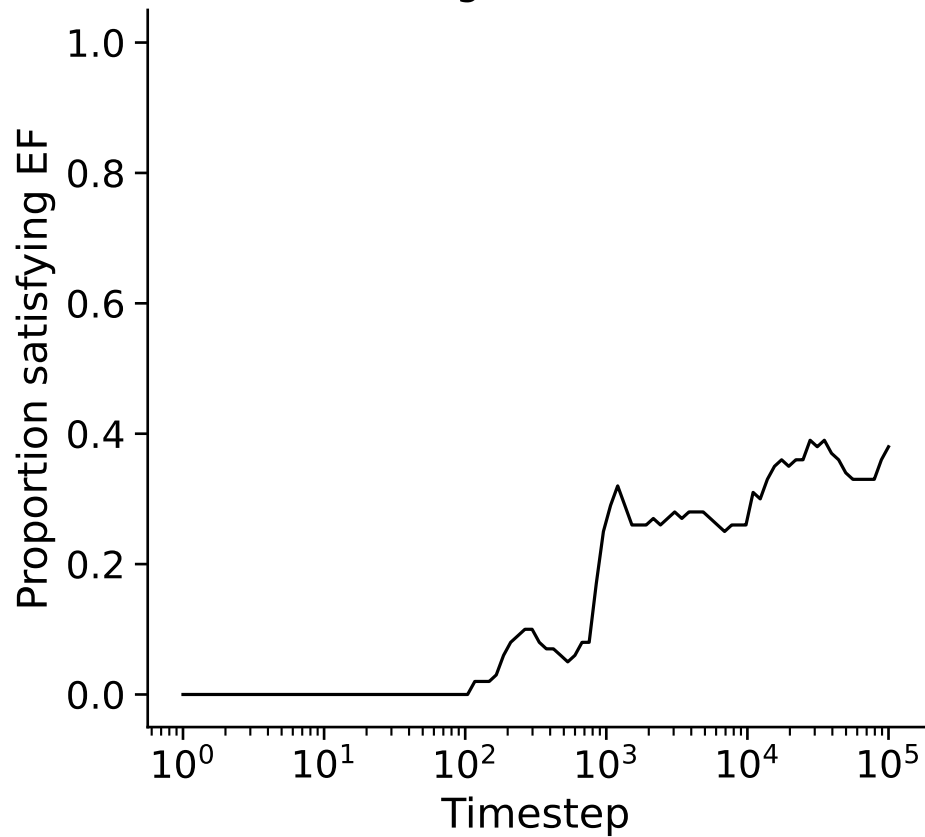

Quantile Maximizing

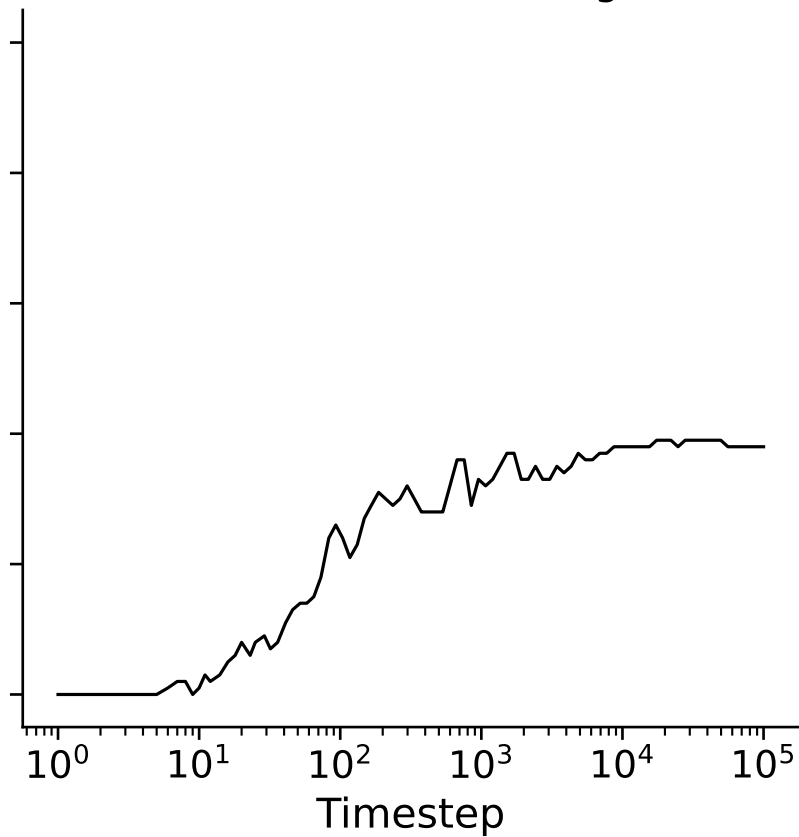

Supplement: opre.2023.0608.sm1.zip [file real-ef-5.pdf › plots/real-ef-5.pdf]

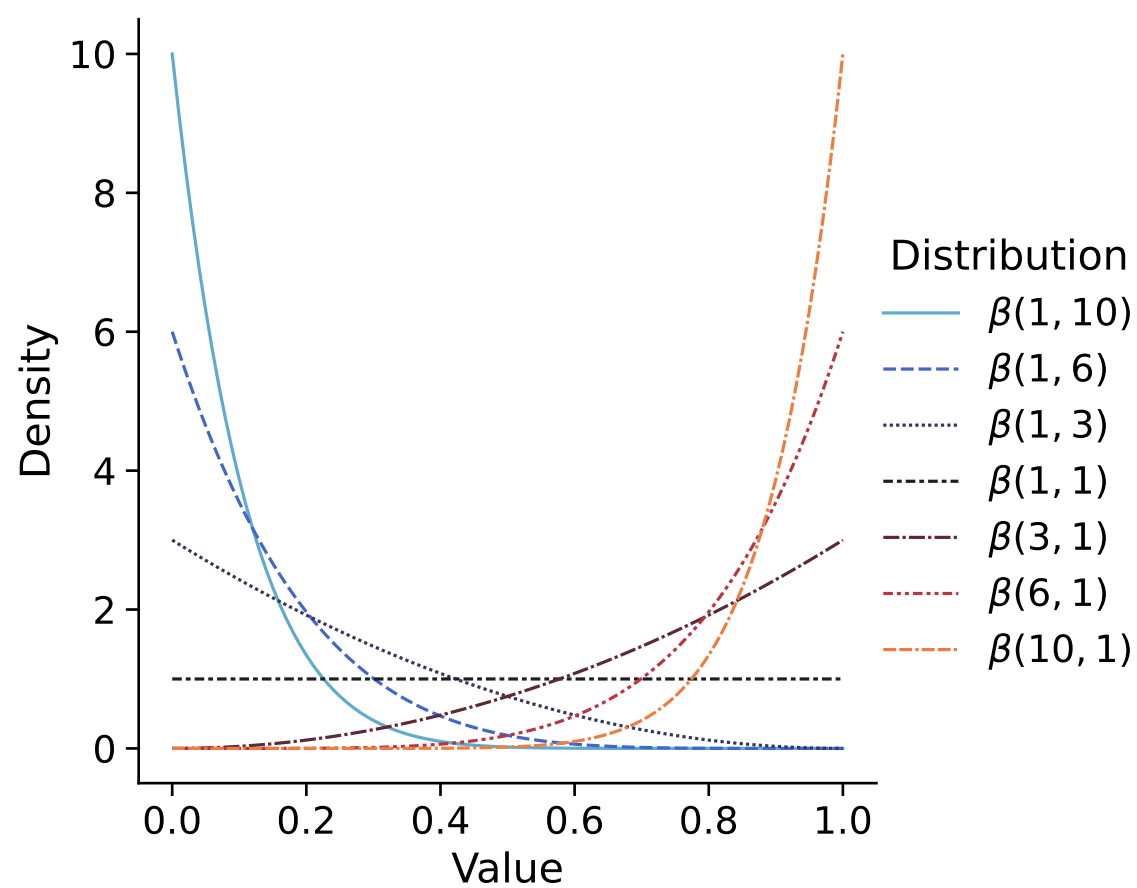

Supplement: opre.2023.0608.sm1.zip [file skewed-dists.pdf › plots/skewed-dists.pdf]

Algorithm 1

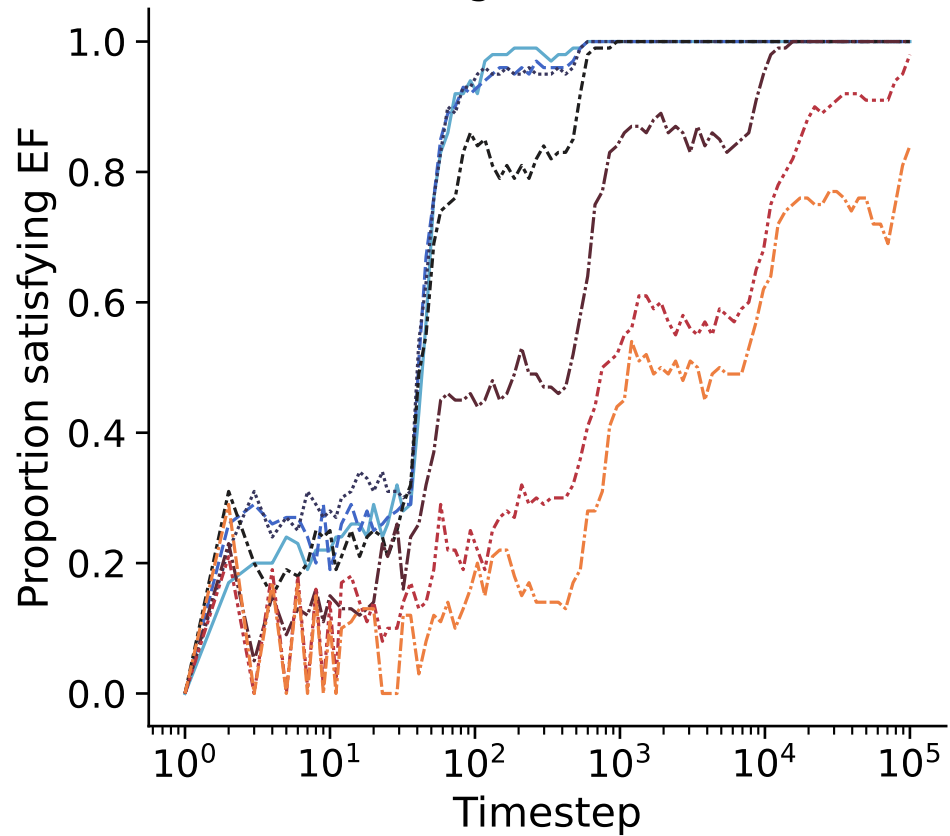

Welfare Maximizing

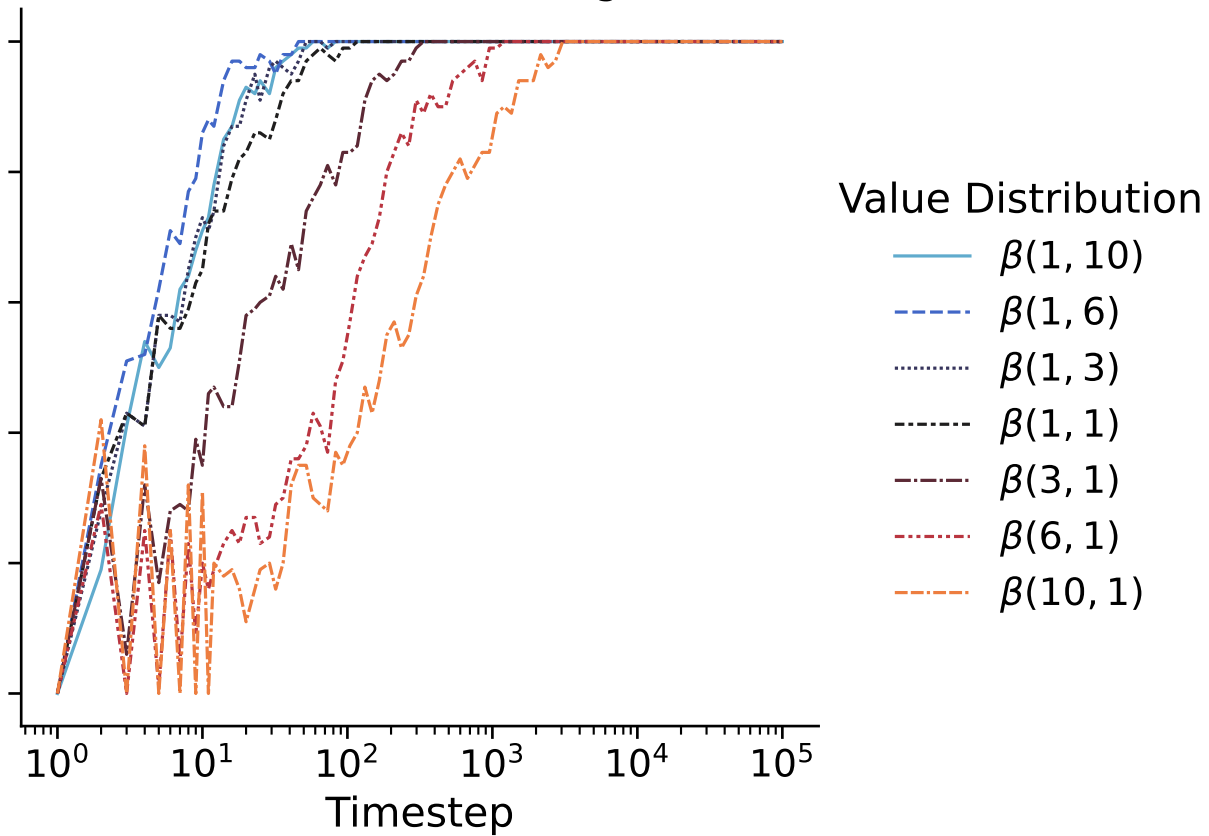

Supplement: opre.2023.0608.sm1.zip [file skewed-ef-2.pdf › plots/skewed-ef-2.pdf]

Algorithm 1

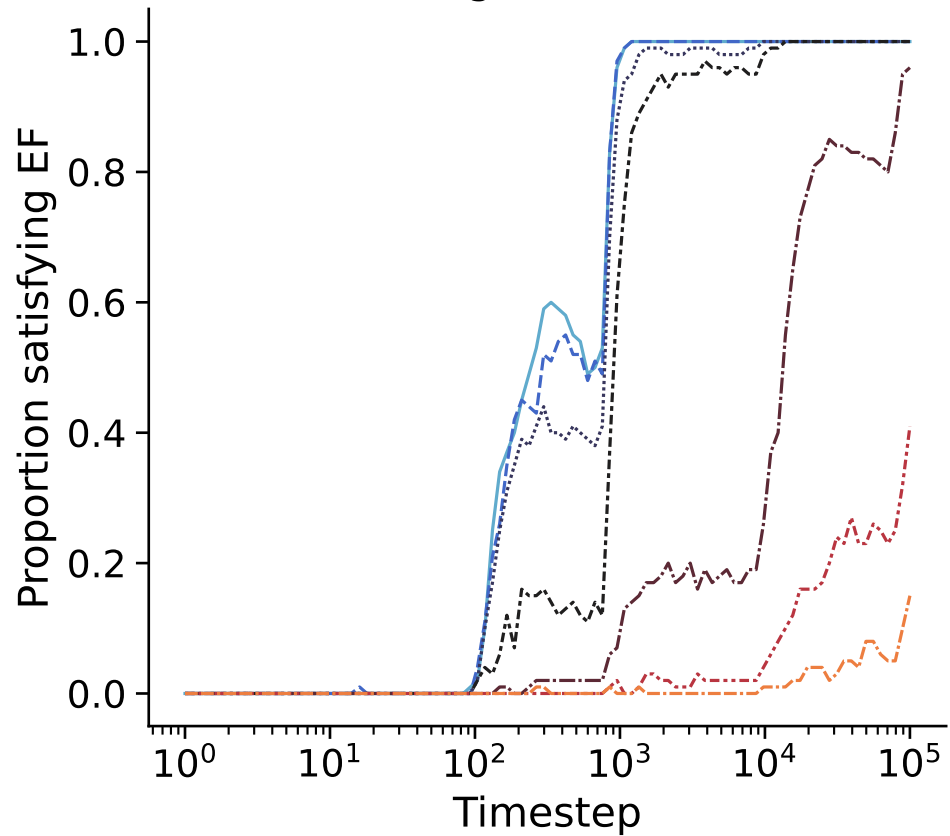

Welfare Maximizing

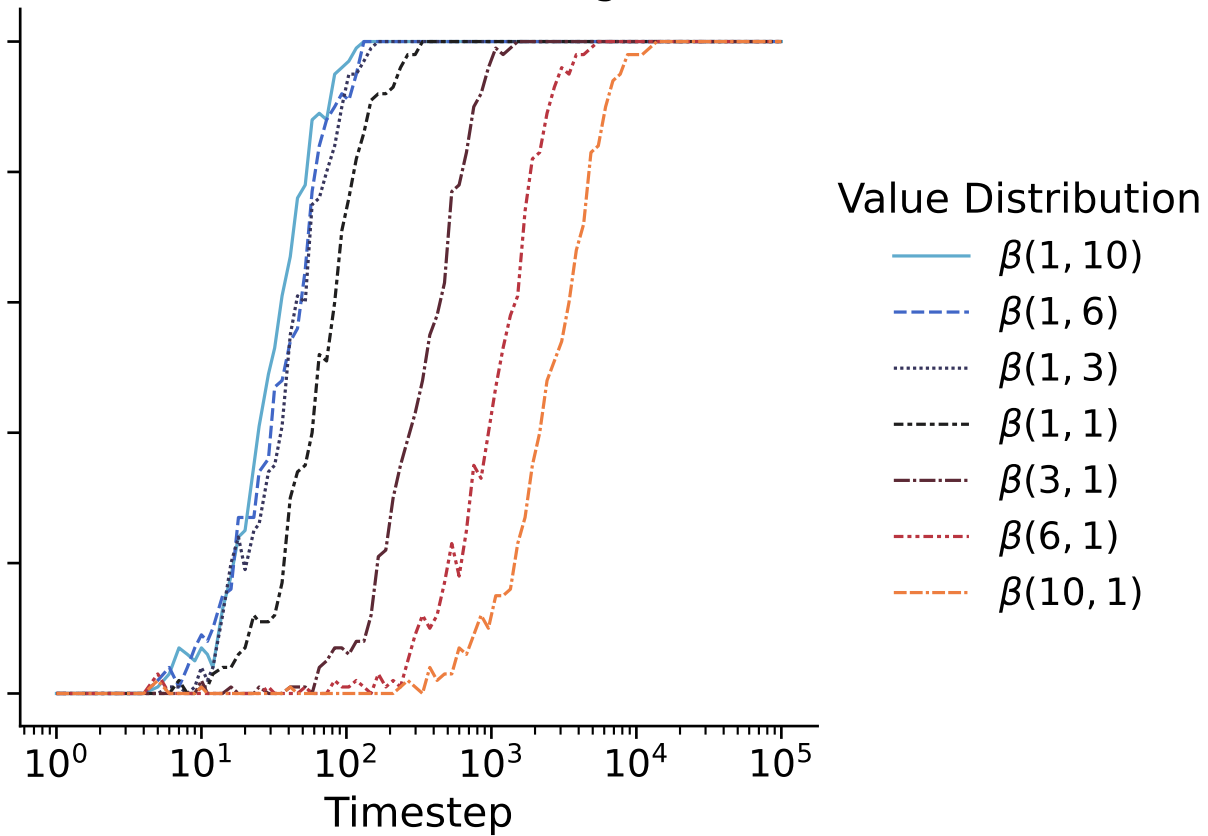

Supplement: opre.2023.0608.sm1.zip [file skewed-ef-5.pdf › plots/skewed-ef-5.pdf]

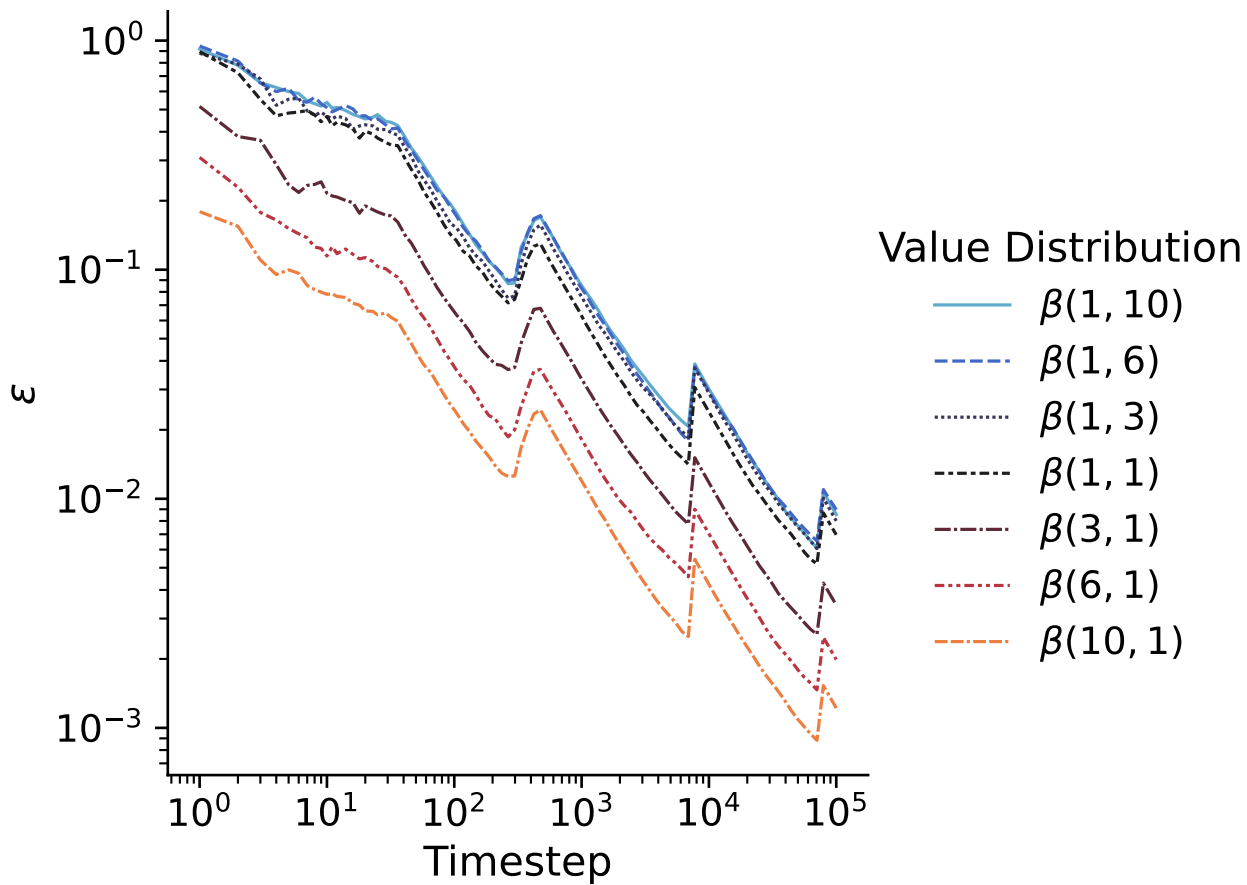

Supplement: opre.2023.0608.sm1.zip [file skewed-welf-2.pdf › plots/skewed-welf-2.pdf]

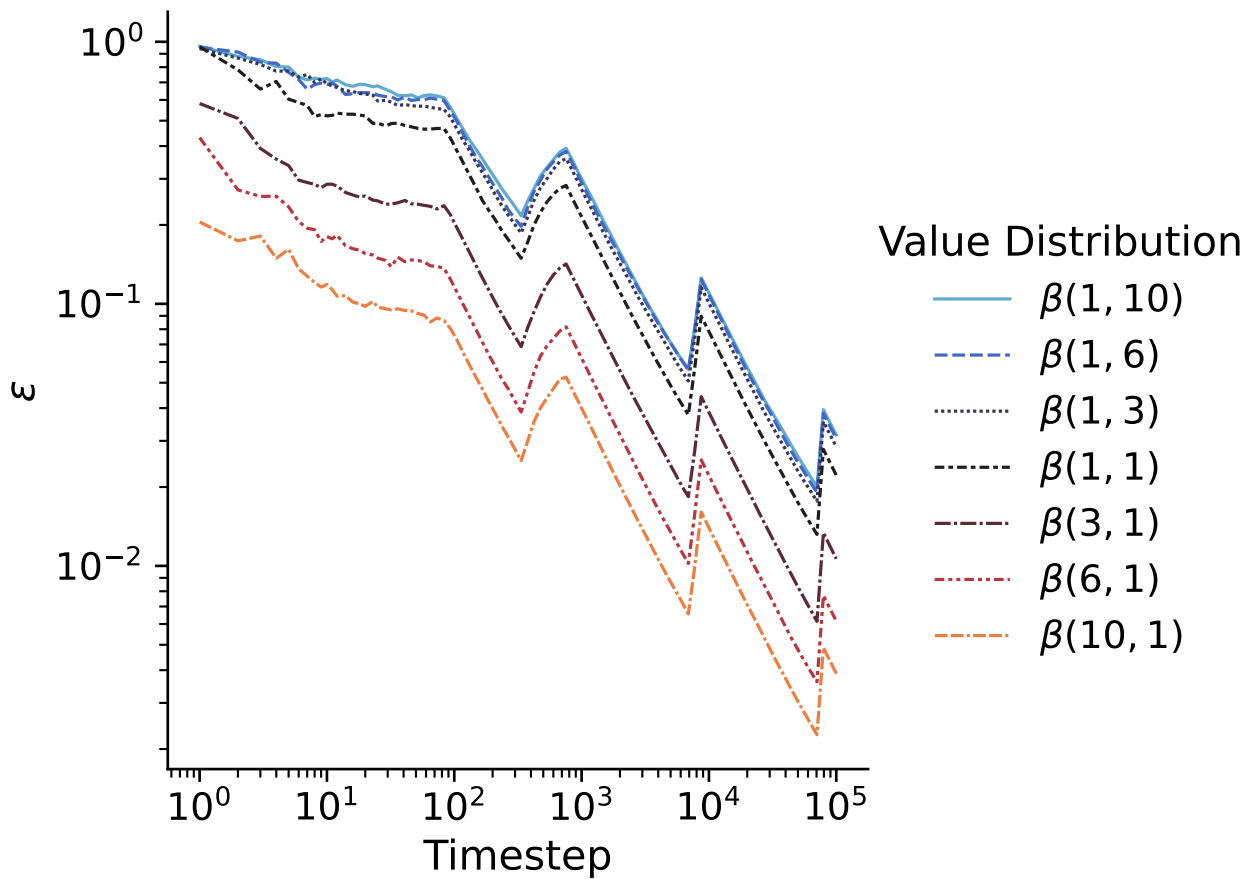

Supplement: opre.2023.0608.sm1.zip [file skewed-welf-5.pdf › plots/skewed-welf-5.pdf]
